# Supplementary material for: Efficiency improvement of semi-transparent perovskite solar cellsviacrystallinity enhancement
Source: Royal Society of Chemistry journal article supplement (doi:10.1039/d2ta08362k), 2023-01-01
Supplement: d2ta08362k1.pdf [file d2ta08362k1.pdf]

## Electronic Supplementary Information

### Efficiency Improvement of Semi-transparent Perovskite Solar Cells via Crystallinity Enhancement

Zhiqian Yang,<sup>a,b</sup> Yunjuan Niu,<sup>a,b</sup> Xianxi Zhang,<sup>c</sup> Zhengguo Zhang,<sup>d</sup> and Linhua Hu<sup>\*a,b,e</sup>

<sup>a</sup> *Key Laboratory of Photovoltaic and Energy Conservation Materials, Institute of Solid State Physics, HFIPS, Chinese Academy of Sciences, Hefei 230031, Anhui, China*

<sup>b</sup> *University of Science and Technology of China, Hefei 230026, Anhui, China*

<sup>c</sup> *Storage & Novel Cell Technology, School of Chemistry and Chemical Engineering, Liaocheng University, Liaocheng 252000, Shandong, China*

<sup>d</sup> *School of Chemistry and Chemical Engineering, North Minzu University, Yinchuan 750021, Ningxia, China*

<sup>e</sup> *Anhui Institute of Innovation for Industrial Technology, Hefei 230088, Anhui, China*

\* Corresponding author.

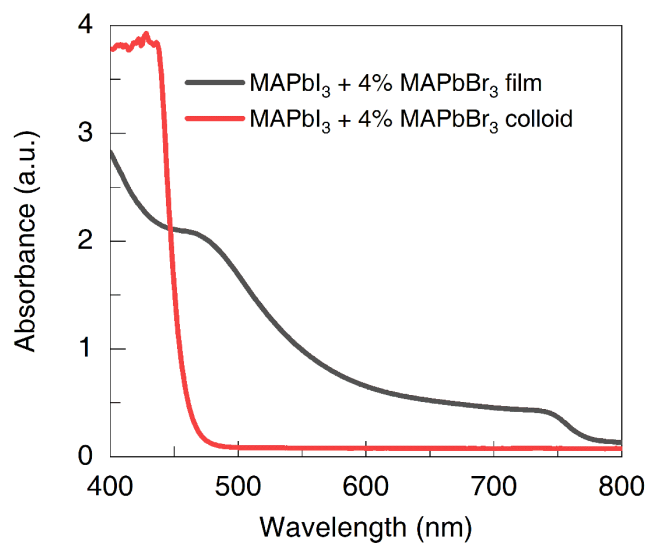

**Fig. S1** UV-vis spectra of colloids (red) and films (black) for  $\text{MAPbI}_3 + 4\% \text{MAPbBr}_3$ .

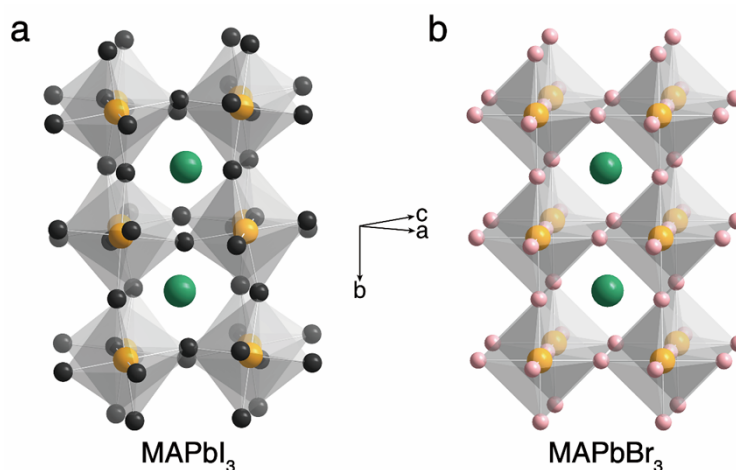

**Fig. S2** (a) Distorted tetragonal perovskite structure of  $\text{MAPbI}_3$  at room temperature. (b) Cubic perovskite structure of  $\text{MAPbBr}_3$  at room temperature.

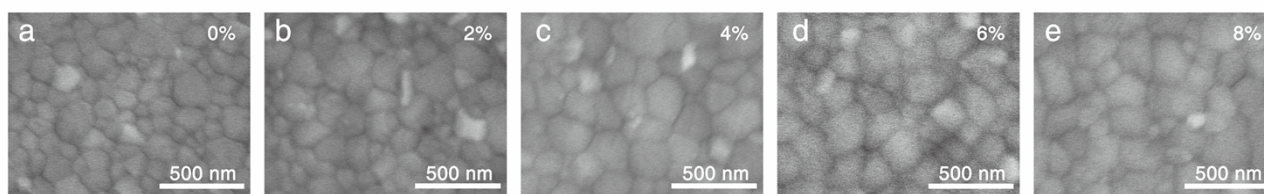

**Fig. S3** Top-view SEM images of  $\text{MAPbI}_3 + x\% \text{MAPbBr}_3$  ( $x = 0, 2, 4, 6, 8$ ) perovskite film deposited in FTO-glass.

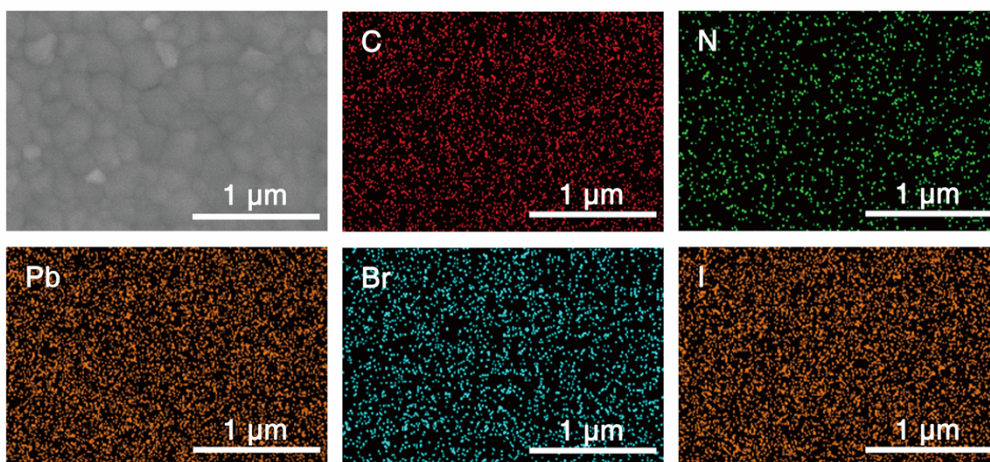

**Fig. S4** EDS mapping of MAPbI<sub>3</sub> + 4% MAPbBr<sub>3</sub> perovskite film.

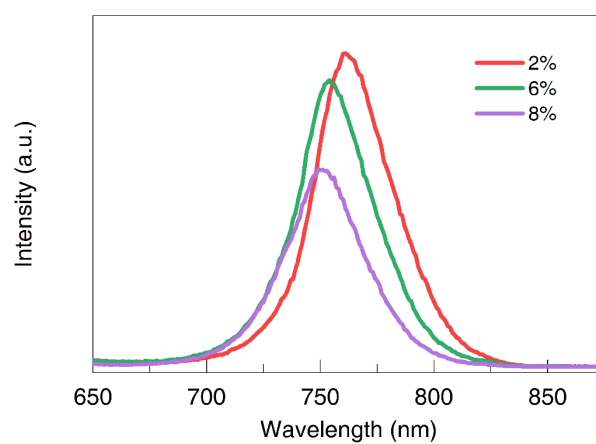

**Fig. S5** PL spectra of MAPbI<sub>3</sub> + x% MAPbBr<sub>3</sub> (x = 2, 6, 8) perovskite film deposited in FTO-glass.

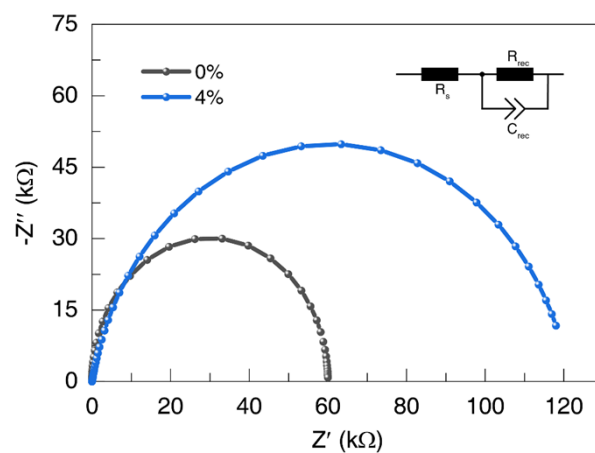

**Fig. S6** Nyquist plots fitted from EIS measurement of MAPbI<sub>3</sub>-based PSCs with and without 4% MAPbBr<sub>3</sub> using equivalent circuits shown in the inset.

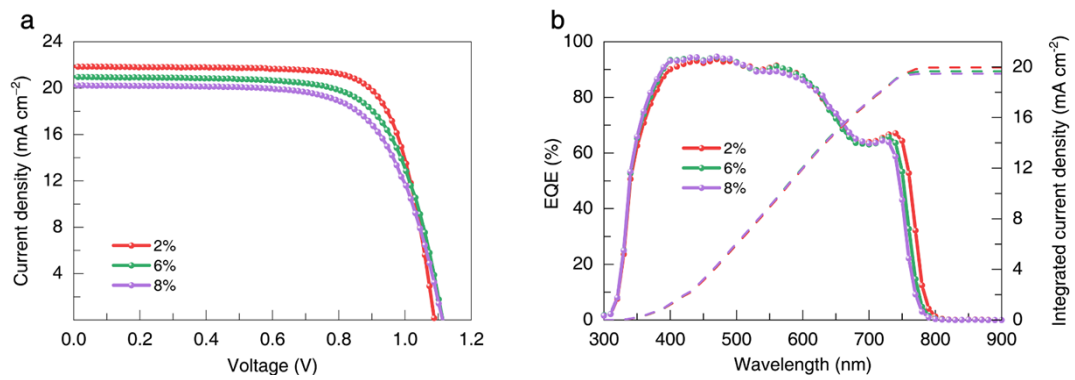

**Fig.S7** (a)  $J$ - $V$  curves for MAPbI<sub>3</sub>-based devices with 2, 6, 8% MAPbBr<sub>3</sub> under reverse scan and corresponding (b) EQE curves and integrated  $J_{sc}$ .

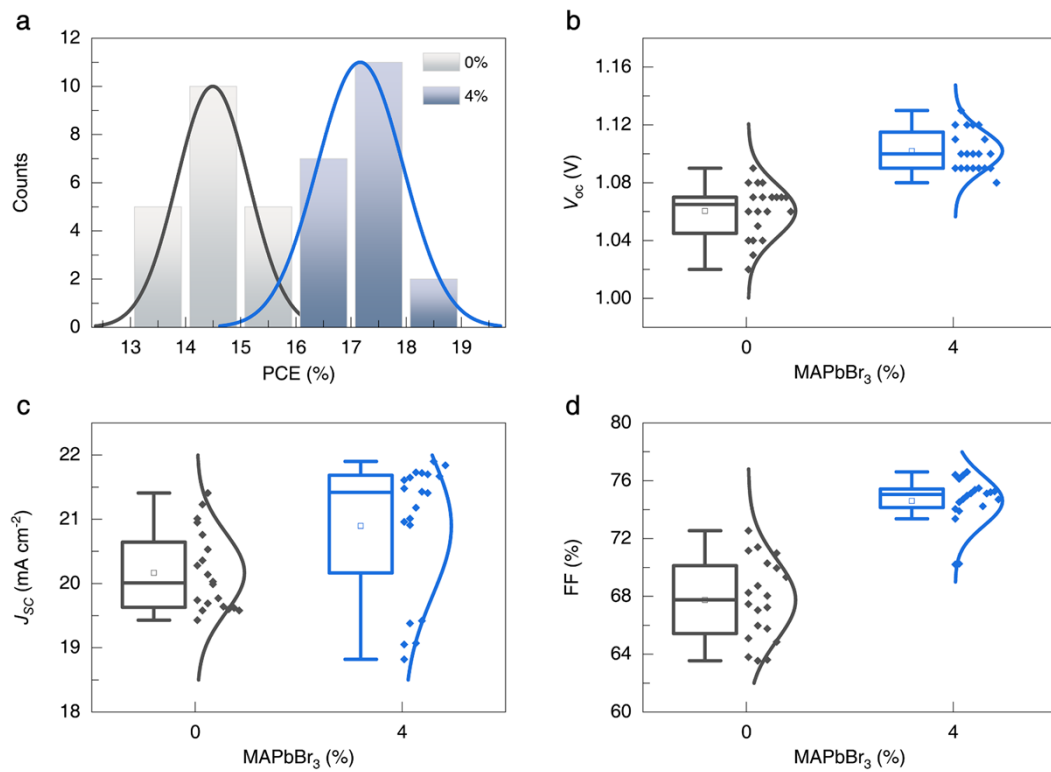

**Fig. S8** (a) PCE histogram fitted with a Gaussian distribution and (b-d) the statistical distribution of corresponding photovoltaic parameters for MAPbI<sub>3</sub>-based PSCs with and without 4% MAPbBr<sub>3</sub> among 20 measured devices.

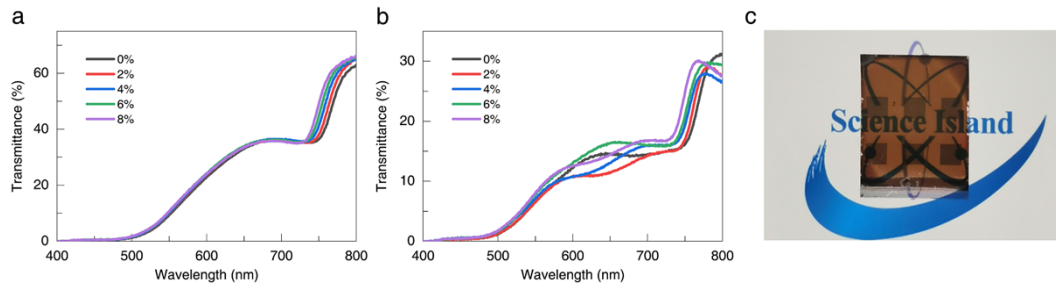

**Fig. S9** Transmittance spectra of  $\text{MAPbI}_3 + x\% \text{MAPbBr}_3$  ( $x = 0, 2, 4, 6, 8$ ) ST-PSCs (a) without and (b) with 10 nm gold as top electrode. (c) Photograph of  $\text{MAPbI}_3 + 4\% \text{MAPbBr}_3$  ST-PSC with 10 nm gold as top electrode.

**Table S1.** Crystal plane spacing (d), lattice constant (a) and FWHM of (110) plane for  $\text{MAPbI}_3 + x\% \text{MAPbBr}_3$  ( $x = 0, 2, 4, 6, 8$ ) films.

| x | d (nm) | a (Å)  | FWHM    |
|---|--------|--------|---------|
| 0 | 0.6289 | 8.8945 | 0.17014 |
| 2 | 0.6281 | 8.8820 | 0.16562 |
| 4 | 0.6267 | 8.8632 | 0.14939 |
| 6 | 0.6267 | 8.8632 | 0.13656 |
| 8 | 0.6254 | 8.8445 | 0.12862 |

**Table S2.** AVT values of films and PSCs based on  $\text{MAPbI}_3 + x\% \text{MAPbBr}_3$  ( $x = 0, 2, 4, 6, 8$ ) with and without top electrode.

| x | AVT (%) |                   |        |
|---|---------|-------------------|--------|
|   | Film    | Device without TE | Device |
| 0 | 25.53   | 21.61             | 9.76   |
| 2 | 26.01   | 22.26             | 10.26  |
| 4 | 26.23   | 22.78             | 10.30  |
| 6 | 27.25   | 23.22             | 10.44  |
| 8 | 27.93   | 23.41             | 11.55  |

**Table S3.** The TRPL fitting results of  $\text{MAPbI}_3$  perovskite films with and without 4%  $\text{MAPbBr}_3$  coated

on FTO/glass.

| <b>x</b> | <b><math>\tau_1</math> (ns)</b> | <b><math>\tau_2</math> (ns)</b> | <b><math>\tau_{avg}</math> (ns)</b> |
|----------|---------------------------------|---------------------------------|-------------------------------------|
| 0        | 9.94                            | 38.50                           | 23.99                               |
| 4        | 14.63                           | 50.43                           | 38.44                               |

**Table S4.** Photovoltaic performance parameters of PSCs based on MAPbI<sub>3</sub> + x% MAPbBr<sub>3</sub> (x = 0, 2, 4, 6, 8).

| <b>x</b> | <b><math>V_{oc}</math><br/>(V)</b> | <b><math>J_{sc}</math><br/>(mA cm<sup>-2</sup>)</b> | <b>Integrated <math>J_{sc}</math><br/>(mA cm<sup>-2</sup>)</b> | <b>FF<br/>(%)</b> | <b>PCE<br/>(%)</b> |
|----------|------------------------------------|-----------------------------------------------------|----------------------------------------------------------------|-------------------|--------------------|
| 0        | 1.06                               | 21.25                                               | 19.84                                                          | 69.68             | 15.69              |
| 2        | 1.09                               | 21.85                                               | 19.96                                                          | 75.20             | 17.89              |
| 4        | 1.10                               | 21.88                                               | 20.19                                                          | 75.79             | 18.27              |
| 6        | 1.11                               | 20.96                                               | 19.66                                                          | 70.21             | 16.39              |
| 8        | 1.11                               | 20.23                                               | 19.47                                                          | 68.47             | 15.42              |

**Table S5.** Photovoltaic performance parameters of PSCs based on MAPbI<sub>3</sub> with and without 4% MAPbBr<sub>3</sub>.

| <b>x</b> |          | <b><math>V_{oc}</math><br/>(V)</b> | <b><math>J_{sc}</math><br/>(mA cm<sup>-2</sup>)</b> | <b>FF<br/>(%)</b> | <b>PCE<br/>(%)</b> |
|----------|----------|------------------------------------|-----------------------------------------------------|-------------------|--------------------|
| 0        | Average  | 1.06 ± 0.02                        | 20.17 ± 0.62                                        | 67.75 ± 2.79      | 14.49 ± 0.65       |
|          | Champion | <b>1.06</b>                        | <b>21.25</b>                                        | <b>69.68</b>      | <b>15.69</b>       |
| 4        | Average  | 1.10 ± 0.01                        | 20.90 ± 1.08                                        | 74.60 ± 1.72      | 17.17 ± 0.78       |
|          | Champion | <b>1.10</b>                        | <b>21.88</b>                                        | <b>75.79</b>      | <b>18.27</b>       |

**Note:** (1) The active area of each device is 0.09 cm<sup>2</sup>; (2) the average parameters are calculated from 20 devices.

**Table S6.** Summary of PCE, AVT, LUE of ST-PSCs with different top electrodes in previous work.

| <b>Top electrode</b> | <b>PCE (%)</b> | <b>AVT (%)</b> | <b>LUE (%)</b> | <b>Year</b> |
|----------------------|----------------|----------------|----------------|-------------|
|----------------------|----------------|----------------|----------------|-------------|

|                                       |              |             |             |                  |
|---------------------------------------|--------------|-------------|-------------|------------------|
| ITO                                   | 15.80        | 6.30        | 1.00        | 2015             |
| Carbon grids                          | 8.21         | 24.00       | 1.97        | 2017             |
| Au                                    | 7.20         | 17.00       | 1.22        | 2018             |
| MoO <sub>3</sub> /Au/MoO <sub>3</sub> | 14.15        | 9.00        | 1.27        | 2018             |
| AZO/Ag/AZO                            | 11.65        | 12.76       | 1.49        | 2019             |
| MoO <sub>3</sub> /Au/MoO <sub>3</sub> | 12.50        | 5.00        | 0.63        | 2020             |
| MoO <sub>x</sub> /Au/MoO <sub>x</sub> | 13.70        | 11.70       | 1.60        | 2021             |
| Au                                    | 11.60        | 22.00       | 2.55        | 2021             |
| ITO                                   | 12.60        | 20.30       | 2.56        | 2021             |
| IGTO                                  | 15.60        | 10.50       | 1.64        | 2021             |
| Au                                    | 14.50        | 14.25       | 2.07        | 2022             |
| Polyimide-integrated graphene         | 15.10        | 18.00       | 2.72        | 2022             |
| <b>Au</b>                             | <b>18.27</b> | <b>10.3</b> | <b>1.88</b> | <b>This work</b> |
